# Supplementary material
Source: PubMed Central journal article supplement (PMC3318366)
Supplement: supp_56.4.2074_TableS1-S3.pdf [file supp_56.4.2074_TableS1-S3.pdf]

1 **SUPPLEMENTAL MATERIAL**

2

3 **Functional and genetic characterization of the Tap efflux pump in**  
4 ***Mycobacterium bovis* BCG**

5

6 ***Ramón-García, S. et al.***

7

8

9 **Description:**

10 Supplemental Material contains tables with the complete list of genes  
11 differentially regulated in exponential and stationary growth phase due to  
12 inactivation of the Tap efflux pump.

14 **Table S1.** Genes differentially regulated in exponential growth phase due to inactivation of the Tap efflux pump.

| Gene <sup>a</sup> | Rv number <sup>b</sup> | q-value <sup>c</sup> | Fold increase <sup>d</sup> | Functional category <sup>e</sup>        |
|-------------------|------------------------|----------------------|----------------------------|-----------------------------------------|
| -                 | Rv0011c                | 0                    | 1.77                       | Cell wall and cell processes            |
| <i>trpG</i>       | Rv0013                 | 0                    | 1.77                       | Intermediary metabolism and respiration |
| -                 | Rv0569                 | 0                    | 1.75                       | Conserved hypotheticals                 |
| -                 | Rv1405c                | 0                    | 1.70                       | Intermediary metabolism and respiration |
| -                 | Rv1813c                | 0                    | 1.78                       | Conserved hypotheticals                 |
| <i>acg</i>        | Rv2032                 | 0                    | 1.89                       | Conserved hypotheticals                 |
| -                 | Rv3127                 | 0                    | 1.71                       | Conserved hypotheticals                 |

15 <sup>a</sup>Genes were included in the Table if their q-value was  $\leq 1$  and the fold increase in gene expression was  $\geq 1.7$ .

16 <sup>b</sup>Genes are annotated as described by the Pasteur Institute on TUBERCULIST (<http://genolist.pasteur.fr/TubercuList/>).

17 <sup>c</sup>q-value indicates the false discovery rate (FDR), probability that the gene was falsely called (calculated by SAM).

18 <sup>d</sup>Values of increase in gene expression by microarrays experiments.

19 <sup>e</sup>Functional categories as per TUBERCULIST (<http://genolist.pasteur.fr/TubercuList/>).

20 **Table S2.** Genes differentially upregulated in stationary growth phase due to inactivation of the Tap efflux pump.

| Gene <sup>a</sup>        | Rv number <sup>b</sup> | q-value <sup>c</sup> | Fold increase <sup>d</sup> | qPCR <sup>e</sup> | Functional category <sup>f</sup>        |
|--------------------------|------------------------|----------------------|----------------------------|-------------------|-----------------------------------------|
| <i>ino1</i>              | Rv0046c                | 0                    | 2.47                       |                   | Intermediary metabolism and respiration |
| -                        | Rv0047c                | 0                    | 4.54                       |                   | Conserved hypotheticals                 |
| -                        | Rv0249c                | 0                    | 2.22                       |                   | Intermediary metabolism and respiration |
| -                        | Rv0250c                | 0.52                 | 2.63                       |                   | Conserved hypotheticals                 |
| <i>Hsp</i>               | Rv0251c                | 0                    | 12.03                      | 18.14 ± 6.17      | Virulence, detoxification, adaptation   |
| -                        | Rv0302                 | 0.90                 | 2.43                       |                   | Regulatory proteins                     |
| -                        | Rv0331                 | 0                    | 2.89                       |                   | Intermediary metabolism and respiration |
| <i>dnaK</i>              | Rv0350                 | 0                    | 8.52                       | 14.21 ± 0.98      | Virulence, detoxification, adaptation   |
| <i>grpE</i>              | Rv0351                 | 0                    | 10.84                      |                   | Virulence, detoxification, adaptation   |
| <i>dnaJ1<sup>g</sup></i> | Rv0352                 | n.a.                 | n.a.                       | 3.91 ± 0.82       | Virulence, detoxification, adaptation   |
| <i>hspR</i>              | Rv0353                 | 0                    | 8.12                       |                   | Virulence, detoxification, adaptation   |
| <i>clpB</i>              | Rv0384c                | 0                    | 6.32                       |                   | Virulence, detoxification, adaptation   |
| <i>groEL2</i>            | Rv0440                 | 0                    | 9.68                       | 20.43 ± 13.50     | Virulence, detoxification, adaptation   |
| <i>mce2A</i>             | Rv0589                 | 0                    | 2.01                       |                   | Virulence, detoxification, adaptation   |
| -                        | Rv0626                 | 0                    | 2.18                       |                   | Virulence, detoxification, adaptation   |
| -                        | Rv0627                 | 0                    | 2.12                       |                   | Virulence, detoxification, adaptation   |
| -                        | Rv0654                 | 0                    | 8.37                       |                   | Intermediary metabolism and respiration |
| <i>mmpS5</i>             | Rv0677c                | 0                    | 2.23                       |                   | Cell wall and cell processes            |
| -                        | Rv0678                 | 0                    | 2.72                       |                   | Conserved hypotheticals                 |
| <i>phoP</i>              | Rv0757                 | 0                    | 2.10                       |                   | Regulatory proteins                     |
| -                        | Rv0767c                | 0                    | 2.92                       |                   | Conserved hypotheticals                 |
| -                        | Rv0789c                | 0                    | 7.58                       |                   | Conserved hypotheticals                 |
| -                        | Rv0790c                | 0                    | 11.11                      |                   | Conserved hypotheticals                 |
| -                        | Rv0791c                | 0                    | 18.08                      |                   | Conserved hypotheticals                 |
| -                        | Rv0792c                | 0                    | 7.77                       |                   | Regulatory proteins                     |

|              |         |      |       |              |                                         |
|--------------|---------|------|-------|--------------|-----------------------------------------|
| -            | Rv0793  | 0    | 6.69  |              | Conserved hypotheticals                 |
| <i>lpqS</i>  | Rv0847  | 0    | 5.10  |              | Cell wall and cell processes            |
| <i>cysK2</i> | Rv0848  | 0    | 4.52  | 10.60 ± 9.23 | Intermediary metabolism and respiration |
| -            | Rv0850  | 0.53 | 1.97  |              | Insertion seqs and phages               |
| -            | Rv0922  | 0    | 2.06  |              | Insertion seqs and phages               |
| -            | Rv1072  | 0.54 | 2.12  |              | Cell wall and cell processes            |
| -            | Rv1073  | 0    | 3.72  |              | Conserved hypotheticals                 |
| -            | Rv1102c | 0    | 2.06  |              | Virulence, detoxification, adaptation   |
| <i>PPE17</i> | Rv1168c | 0    | 9.96  |              | PE/PPE                                  |
| <i>PE11</i>  | Rv1169c | 0    | 10.80 |              | PE/PPE                                  |
| -            | Rv1265  | 0    | 8.68  |              | Conserved hypotheticals                 |
| <i>cysN</i>  | Rv1286  | 0    | 3.29  |              | Intermediary metabolism and respiration |
| -            | Rv1287  | 0    | 2.55  |              | Conserved hypotheticals                 |
| <i>prfA</i>  | Rv1299  | 0    | 2.71  |              | Information pathways                    |
| <i>atpB</i>  | Rv1304  | 0    | 2.25  |              | Intermediary metabolism and respiration |
| <i>trxB1</i> | Rv1471  | 0    | 2.56  | 4.92 ± 1.16  | Intermediary metabolism and respiration |
| <i>Can</i>   | Rv1475c | 0.97 | 2.50  |              | Intermediary metabolism and respiration |
| <i>papA4</i> | Rv1528c | 0    | 2.07  |              | Lipid metabolism                        |
| <i>nadA</i>  | Rv1594  | 0    | 1.97  |              | Intermediary metabolism and respiration |
| <i>nadB</i>  | Rv1595  | 0    | 4.39  |              | Intermediary metabolism and respiration |
| -            | Rv1597  | 0.85 | 3.69  |              | Conserved hypotheticals                 |
| -            | Rv1812c | 0    | 5.78  |              | Intermediary metabolism and respiration |
| -            | Rv1813c | 0    | 8.31  |              | Conserved hypotheticals                 |
| -            | Rv1839c | 0    | 2.23  |              | Virulence, detoxification, adaptation   |
| -            | Rv1874  | 1.25 | 3.13  |              | Conserved hypotheticals                 |
| -            | Rv1875  | 0.86 | 2.64  |              | Conserved hypotheticals                 |

|             |         |      |      |             |                                         |
|-------------|---------|------|------|-------------|-----------------------------------------|
| <i>katG</i> | Rv1908c | 0    | 2.54 | 3.0 ± 1.3   | Virulence, detoxification, adaptation   |
| <i>furA</i> | Rv1909c | 0    | 4.94 |             | Regulatory proteins                     |
| -           | Rv1943c | 0    | 2.12 |             | Virulence, detoxification, adaptation   |
| -           | Rv1990c | 0    | 2.03 |             | Intermediary metabolism and respiration |
| <i>ctpG</i> | Rv1992c | 0    | 3.32 |             | Cell wall and cell processes            |
| <i>cmtR</i> | Rv1994c | 0    | 4.50 |             | Regulatory proteins                     |
| -           | Rv2010  | 0    | 2.34 |             | Virulence, detoxification, adaptation   |
| -           | Rv2016  | 0    | 2.62 |             | Conserved hypotheticals                 |
| -           | Rv2020c | 0    | 1.84 |             | Conserved hypotheticals                 |
| -           | Rv2021c | 0    | 3.39 |             | Regulatory proteins                     |
| -           | Rv2022c | 0.38 | 3.01 |             | Conserved hypotheticals                 |
| -           | Rv2034  | 0.38 | 6.34 |             | Regulatory proteins                     |
| -           | Rv2035  | 0    | 6.24 |             | Conserved hypotheticals                 |
| -           | Rv2036  | 0    | 3.48 |             | Intermediary metabolism and respiration |
| -           | Rv2052c | 0.20 | 2.02 |             | Conserved hypotheticals                 |
| -           | Rv2053c | 0.53 | 2.26 |             | Cell wall and cell processes            |
| -           | Rv2103c | 0.20 | 2.14 |             | Virulence, detoxification, adaptation   |
| -           | Rv2104c | 0    | 2.89 |             | Virulence, detoxification, adaptation   |
| <i>Mez</i>  | Rv2332  | 0    | 4.01 | 5.16 ± 2.52 | Intermediary metabolism and respiration |
| -           | Rv2466c | 0    | 5.78 |             | Conserved hypotheticals                 |
| -           | Rv2516c | 0    | 3.94 |             | Conserved hypotheticals                 |
| -           | Rv2517c | 0    | 3.17 |             | Conserved hypotheticals                 |
| -           | Rv2602  | 0    | 2.32 |             | Virulence, detoxification, adaptation   |
| -           | Rv2617c | 0    | 4.72 |             | Cell wall and cell processes            |
| -           | Rv2642  | 0    | 8.59 |             | Regulatory proteins                     |
| -           | Rv2693c | 0    | 2.56 |             | Cell wall and cell processes            |
| -           | Rv2694c | 0    | 3.95 |             | Conserved hypotheticals                 |

|                |         |      |       |               |                                         |
|----------------|---------|------|-------|---------------|-----------------------------------------|
| -              | Rv2743c | 0    | 2.12  |               | Cell wall and cell processes            |
| <i>35kd_ag</i> | Rv2744c | 0    | 3.43  |               | Conserved hypotheticals                 |
| -              | Rv2837c | 0    | 3.56  |               | Conserved hypotheticals                 |
| <i>rbfA</i>    | Rv2838c | 0.79 | 1.83  |               | Information pathways                    |
| <i>infB</i>    | Rv2839c | 0    | 2.46  |               | Information pathways                    |
| -              | Rv2865  | 0    | 3.82  |               | Virulence, detoxification, adaptation   |
| -              | Rv2912c | 0    | 6.81  |               | Regulatory proteins                     |
| -              | Rv2913c | 0    | 24.75 |               | Intermediary metabolism and respiration |
| -              | Rv2949c | 0.38 | 2.10  |               | Conserved hypotheticals                 |
| <i>nrdE</i>    | Rv3051c | 0    | 3.00  |               | Information pathways                    |
| <i>nrdI</i>    | Rv3052c | 0    | 4.07  |               | Information pathways                    |
| <i>nrdH</i>    | Rv3053c | 0    | 4.30  |               | Information pathways                    |
| -              | Rv3122  | 0    | 1.99  |               | Conserved hypotheticals                 |
| -              | Rv3160c | 0    | 2.86  |               | Regulatory proteins                     |
| -              | Rv3182  | 0.20 | 3.16  |               | Conserved hypotheticals                 |
| -              | Rv3269  | 0    | 7.03  |               | Virulence, detoxification, adaptation   |
| -              | Rv3272  | 0    | 3.34  |               | Virulence, detoxification, adaptation   |
| -              | Rv3334  | 0.38 | 1.97  |               | Regulatory proteins                     |
| <i>groEL1</i>  | Rv3417c | 0    | 7.51  | 17.55 ± 11.64 | Virulence, detoxification, adaptation   |
| <i>groES</i>   | Rv3418c | 0    | 6.35  |               | Virulence, detoxification, adaptation   |
| <i>ispF</i>    | Rv3581c | 0    | 2.91  |               | Intermediary metabolism and respiration |
| -              | Rv3833  | 0    | 2.57  |               | Regulatory proteins                     |
| <i>bfrB</i>    | Rv3841  | 0    | 3.14  |               | Intermediary metabolism and respiration |
| <i>whiB6</i>   | Rv3862c | 0    | 6.00  | 4.39 ± 0.93   | Regulatory proteins                     |
| -              | Rv3863  | 0    | 2.68  |               | Conserved hypotheticals                 |
| -              | Rv3864  | 0    | 5.48  |               | Conserved hypotheticals                 |
| -              | Rv3865  | 0    | 2.16  |               | Conserved hypotheticals                 |

|             |         |   |      |                                         |
|-------------|---------|---|------|-----------------------------------------|
| -           | Rv3866  | 0 | 2.44 | Conserved hypotheticals                 |
| -           | Rv3880c | 0 | 2.27 | Conserved hypotheticals                 |
| -           | Rv3881c | 0 | 2.09 | Conserved hypotheticals                 |
| <i>trxC</i> | Rv3914  | 0 | 3.31 | Intermediary metabolism and respiration |

21 <sup>a</sup>Genes were included in the Table if their q-value was  $\leq 1$  (unless included as part of an operon) and the fold increase in  
 22 gene expression was  $\geq 1.7$ .

23 <sup>b</sup>Genes are annotated as described by the Pasteur Institute on TUBERCULIST (<http://genolist.pasteur.fr/TubercuList/>).

24 <sup>c</sup>q-value indicates the false discovery rate (FDR), probability that the gene was falsely called (calculated by SAM).

25 <sup>d</sup>Values of increase in gene expression by microarrays experiments.

26 <sup>e</sup>Data represent mean values of two biological independent experiments performed in duplicate. Standard deviation in  
 27 shown.

28 <sup>f</sup>Functional categories as per TUBERCULIST (<http://genolist.pasteur.fr/TubercuList/>).

29 <sup>g</sup>This gene was included in the table based on the results obtained by RT-PCR, since no data were obtained from the  
 30 DNA microarrays experiments.

31 n.a., not available.

32

33 **Table S3.** Genes differentially downregulated in stationary growth phase due to inactivation of the Tap efflux pump.

| Gene <sup>a</sup> | Rv number <sup>b</sup> | q-value <sup>c</sup> | Fold decrease <sup>d</sup> | qPCR <sup>e</sup> | Functional category <sup>f</sup>        |
|-------------------|------------------------|----------------------|----------------------------|-------------------|-----------------------------------------|
| -                 | Rv0043c                | 0                    | 0.48                       |                   | Regulatory proteins                     |
| -                 | Rv0079                 | 0                    | 0.49                       |                   | Conserved hypotheticals                 |
| -                 | Rv0080                 | 0.38                 | 0.59                       |                   | Conserved hypotheticals                 |
| <i>fbpC</i>       | Rv0129c                | 0                    | 0.56                       |                   | Lipid metabolism                        |
| <i>mce1E</i>      | Rv0173                 | 0.55                 | 0.51                       |                   | Cell wall and cell processes            |
| -                 | Rv0188                 | 0                    | 0.50                       |                   | Cell wall and cell processes            |
| -                 | Rv0373c                | 0                    | 0.22                       |                   | Intermediary metabolism and respiration |
| -                 | Rv0374c                | 0.86                 | 0.42                       |                   | Intermediary metabolism and respiration |
| <i>galE2</i>      | Rv0501                 | 0                    | 0.44                       | 0.50 ± 0.17       | Intermediary metabolism and respiration |
| <i>fadB</i>       | Rv0860                 | 0                    | 0.38                       |                   | Lipid metabolism                        |
| <i>PE_PGRS15</i>  | Rv0872c                | 0                    | 0.40                       |                   | PE/PPE                                  |
| <i>metS</i>       | Rv1007c                | 0.84                 | 0.57                       |                   | Information pathways                    |
| <i>esxJ</i>       | Rv1038c                | 0.95                 | 0.45                       |                   | Cell wall and cell processes            |
| <i>sigE</i>       | Rv1221                 | 0                    | 0.37                       |                   | Information pathways                    |
| <i>eccB5</i>      | Rv1782 <sup>g</sup>    | n.a.                 | n.a.                       | 0.43 ± 1.38       | Cell wall and cell processes            |
| <i>eccCb5</i>     | Rv1784                 | 0                    | 0.44                       | 0.36 ± 0.27       | Cell wall and cell processes            |
| <i>PPE26</i>      | Rv1789 <sup>g</sup>    | n.a.                 | n.a.                       | 0.31 ± 0.11       | PE/PPE                                  |
| <i>esxM</i>       | Rv1792                 | 0.51                 | 0.44                       | 0.13 ± 0.01       | Cell wall and cell processes            |
| <i>esxN</i>       | Rv1793 <sup>g</sup>    | n.a.                 | n.a.                       | 0.28 ± 0.02       | Cell wall and cell processes            |
| <i>mycP5</i>      | Rv1796                 | 0                    | 0.42                       |                   | Intermediary metabolism and respiration |
| -                 | Rv1797                 | 0                    | 0.53                       |                   | Cell wall and cell processes            |
| <i>eccA5</i>      | Rv1798 <sup>g</sup>    | n.a.                 | n.a.                       | 0.39 ± 0.12       | Cell wall and cell processes            |
| <i>Ndh</i>        | Rv1854c                | 0                    | 0.49                       |                   | Intermediary metabolism and respiration |
| -                 | Rv1862                 | 0.51                 | 0.57                       |                   | Intermediary metabolism and respiration |



|              |         |      |      |             |                                         |
|--------------|---------|------|------|-------------|-----------------------------------------|
| <i>ahpE</i>  | Rv2238c | 0.92 | 0.48 |             | Virulence, detoxification, adaptation   |
| -            | Rv2405  | 0    | 0.54 |             | Conserved hypotheticals                 |
| -            | Rv2418c | 0    | 0.49 |             | Conserved hypotheticals                 |
| -            | Rv2621c | 0    | 0.42 |             | Regulatory proteins                     |
| -            | Rv2721c | 0.20 | 0.41 |             | Cell wall and cell processes            |
| <i>Rip</i>   | Rv2869c | 0.54 | 0.59 |             | Cell wall and cell processes            |
| <i>mpt70</i> | Rv2875  | 0    | 0.36 |             | Cell wall and cell processes            |
| <i>adhC</i>  | Rv3045  | 0    | 0.40 |             | Intermediary metabolism and respiration |
| <i>nuoJ</i>  | Rv3154  | 0.20 | 0.51 |             | Intermediary metabolism and respiration |
| -            | Rv3222c | 0    | 0.55 |             | Conserved hypotheticals                 |
| <i>sugI</i>  | Rv3331  | 0    | 0.12 | 0.01 ± 0.00 | Cell wall and cell processes            |
| <i>nagA</i>  | Rv3332  | 0.38 | 0.38 |             | Cell wall and cell processes            |
| <i>esxU</i>  | Rv3445c | 0    | 0.30 |             | Cell wall and cell processes            |
| <i>Crp</i>   | Rv3676  | 0    | 0.45 |             | Regulatory proteins                     |
| <i>Asd</i>   | Rv3708c | 0.55 | 0.41 |             | Intermediary metabolism and respiration |
| <i>proX</i>  | Rv3759c | 0    | 0.51 |             | Virulence, detoxification, adaptation   |

34 <sup>a</sup>Genes were included in the Table if their q-value was  $\leq 1$  (unless it was included as part of an operon) and the fold  
35 decrease in gene expression was  $\leq 0.7$ .

36 <sup>b</sup>Genes are annotated as described by the Pasteur Institute on TUBERCULIST (<http://genolist.pasteur.fr/TubercuList/>).

37 <sup>c</sup>q-value indicates the false discovery rate (FDR), probability that the gene was falsely called (calculated by SAM).

38 <sup>d</sup>Values of decrease in gene expression by microarrays experiments.

39 <sup>e</sup>Data represent mean values of two biological independent experiments performed in duplicate. Standard deviation in  
40 shown.

41 <sup>f</sup>Functional categories as per TUBERCULIST (<http://genolist.pasteur.fr/TubercuList/>).

- 42 <sup>9</sup>This gene was included in the table based on the results obtained by RT-PCR, since no data were obtained from the  
43 DNA microarrays experiments.  
44 n.a., not availabl
